# Supplementary material
Source: MDPI journal article supplement (https://www.mdpi.com/2072-4292/14/22/5733)

Figure S1. Visualization of Critical Points

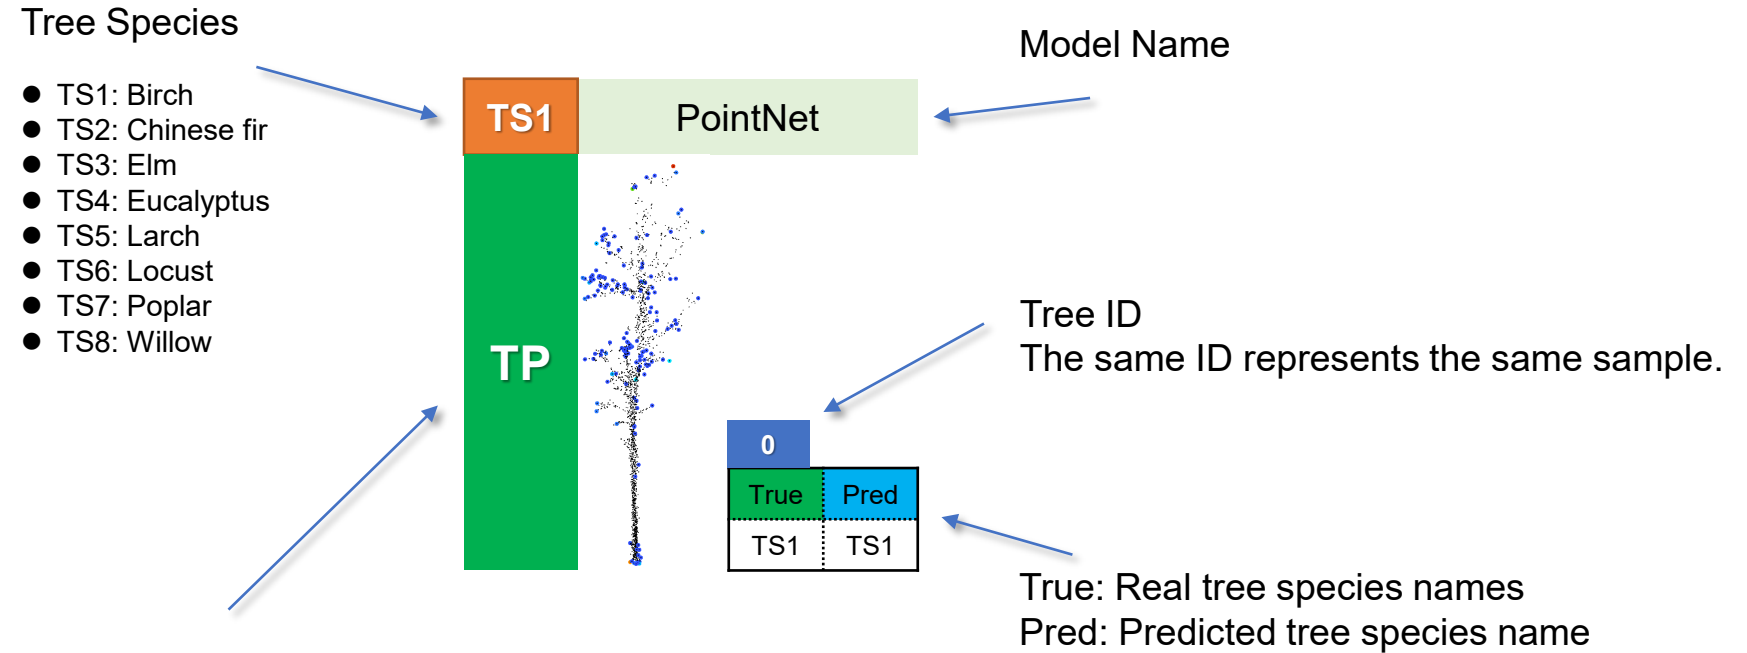

TP: the prediction of positive samples as positive.  
FN: the prediction of positive samples as negative.  
FP: the prediction of negative samples as positive.

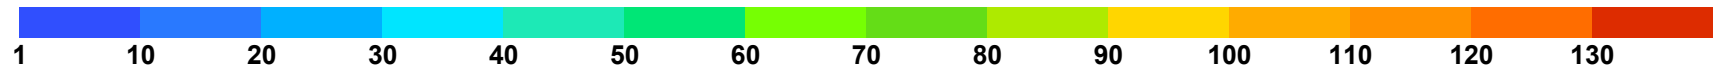

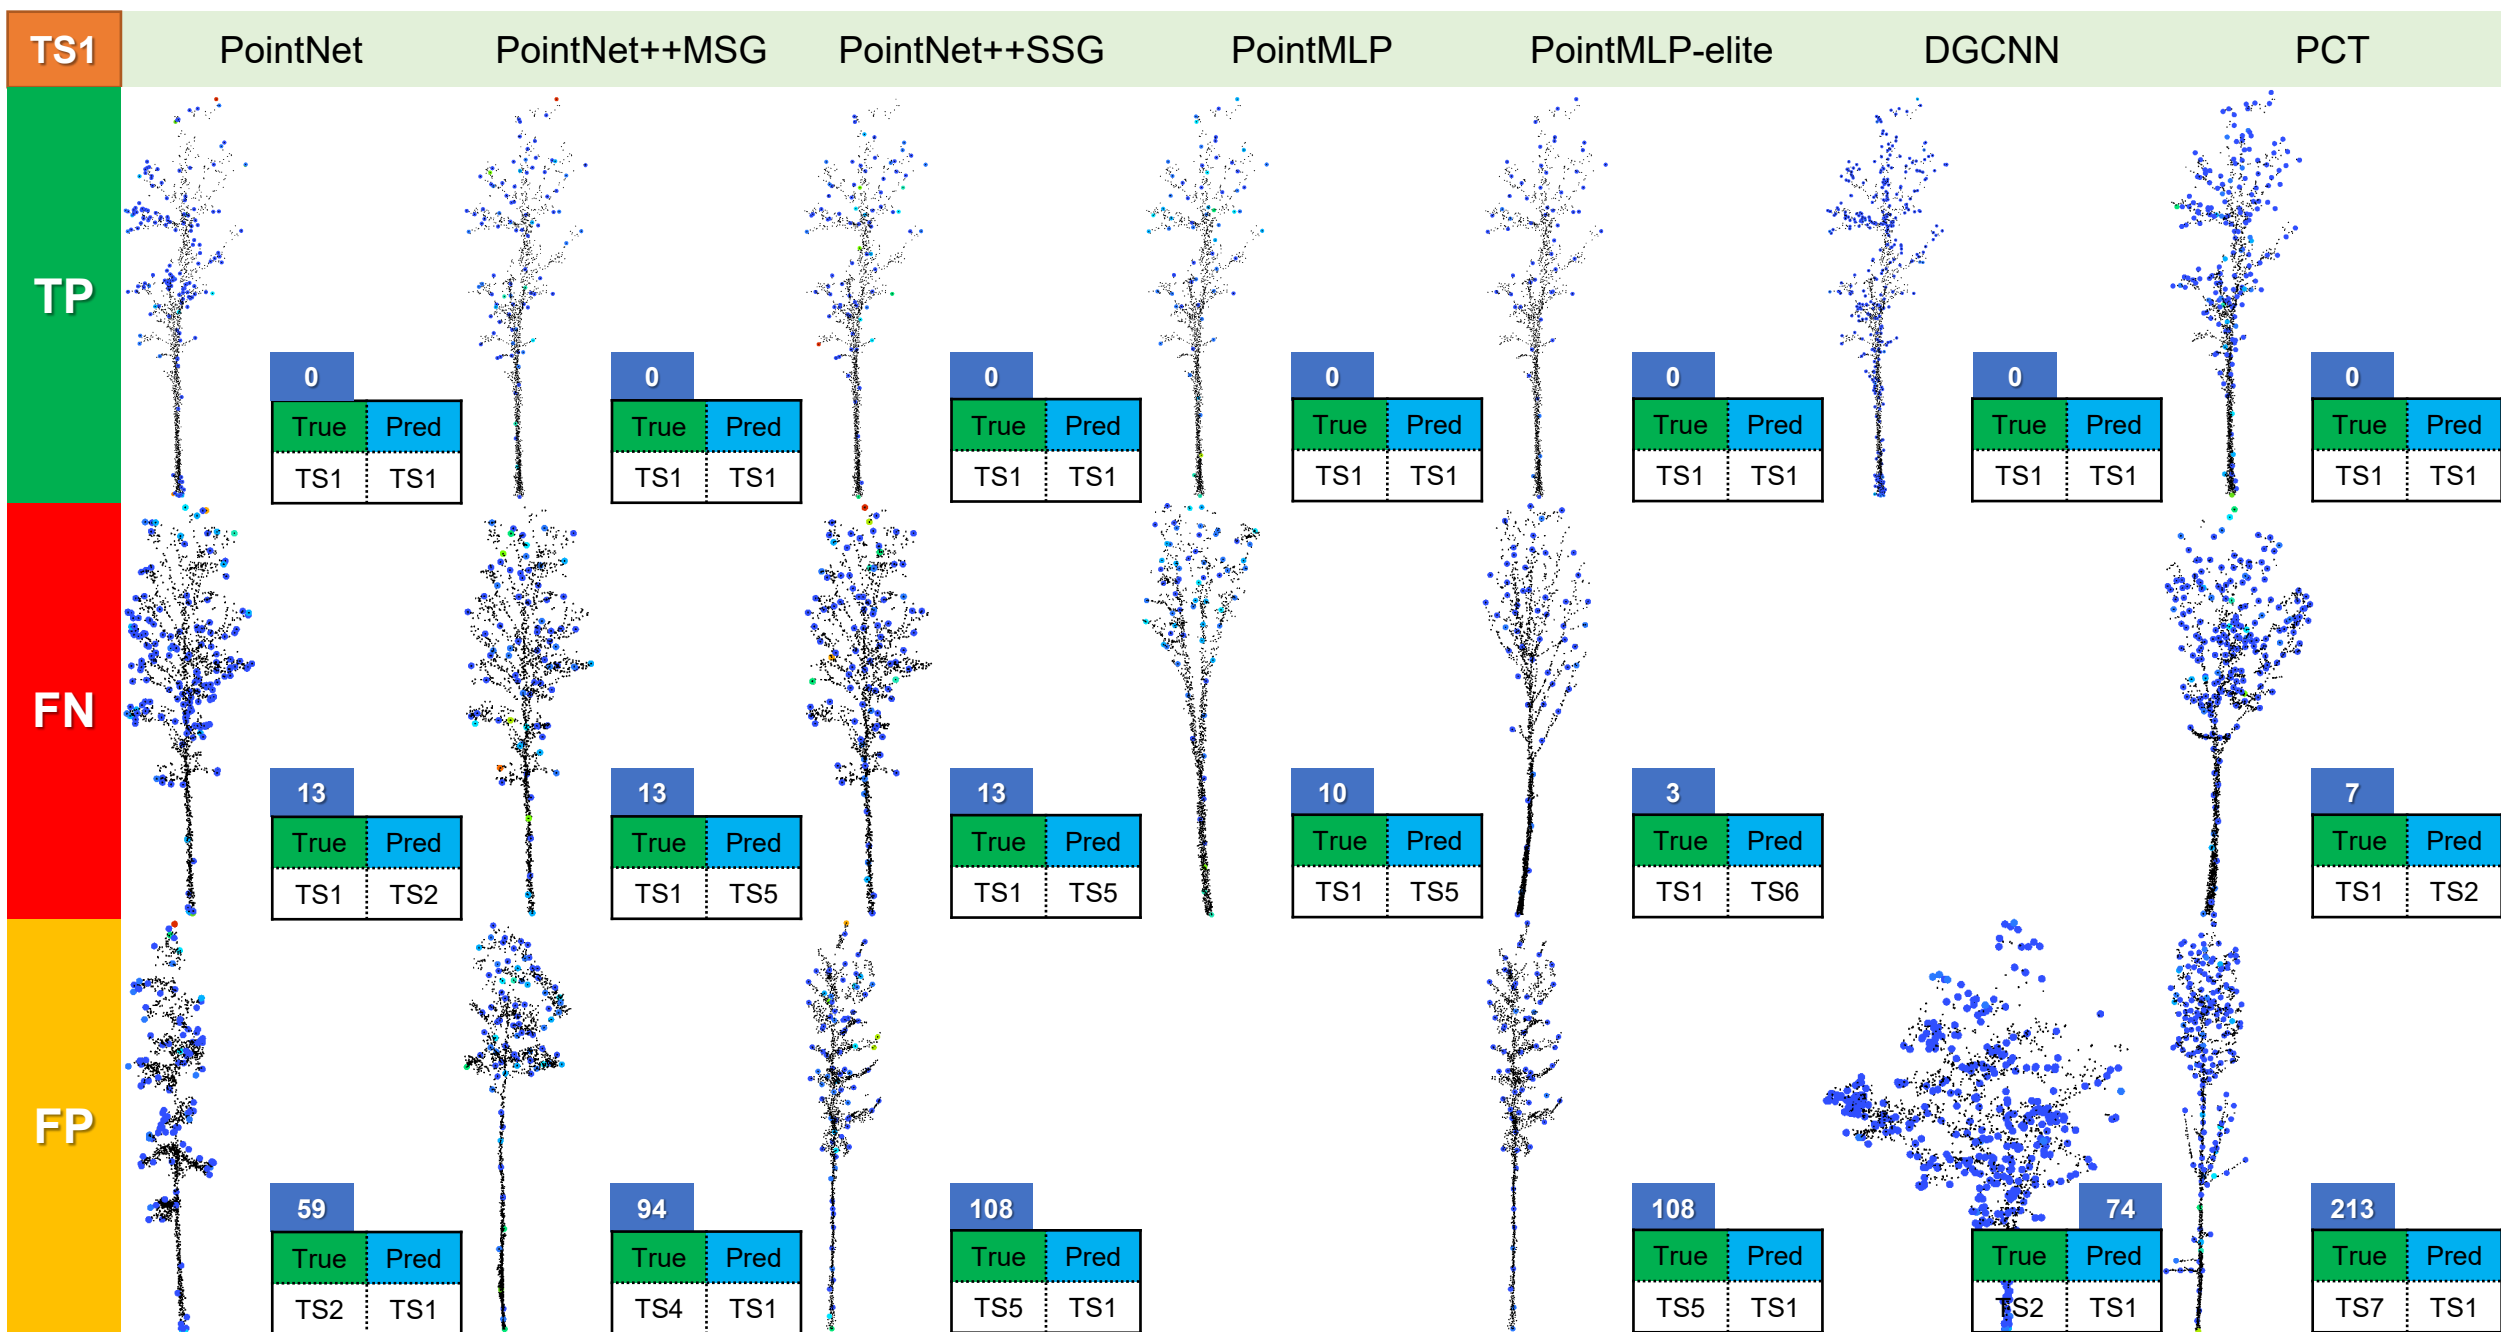

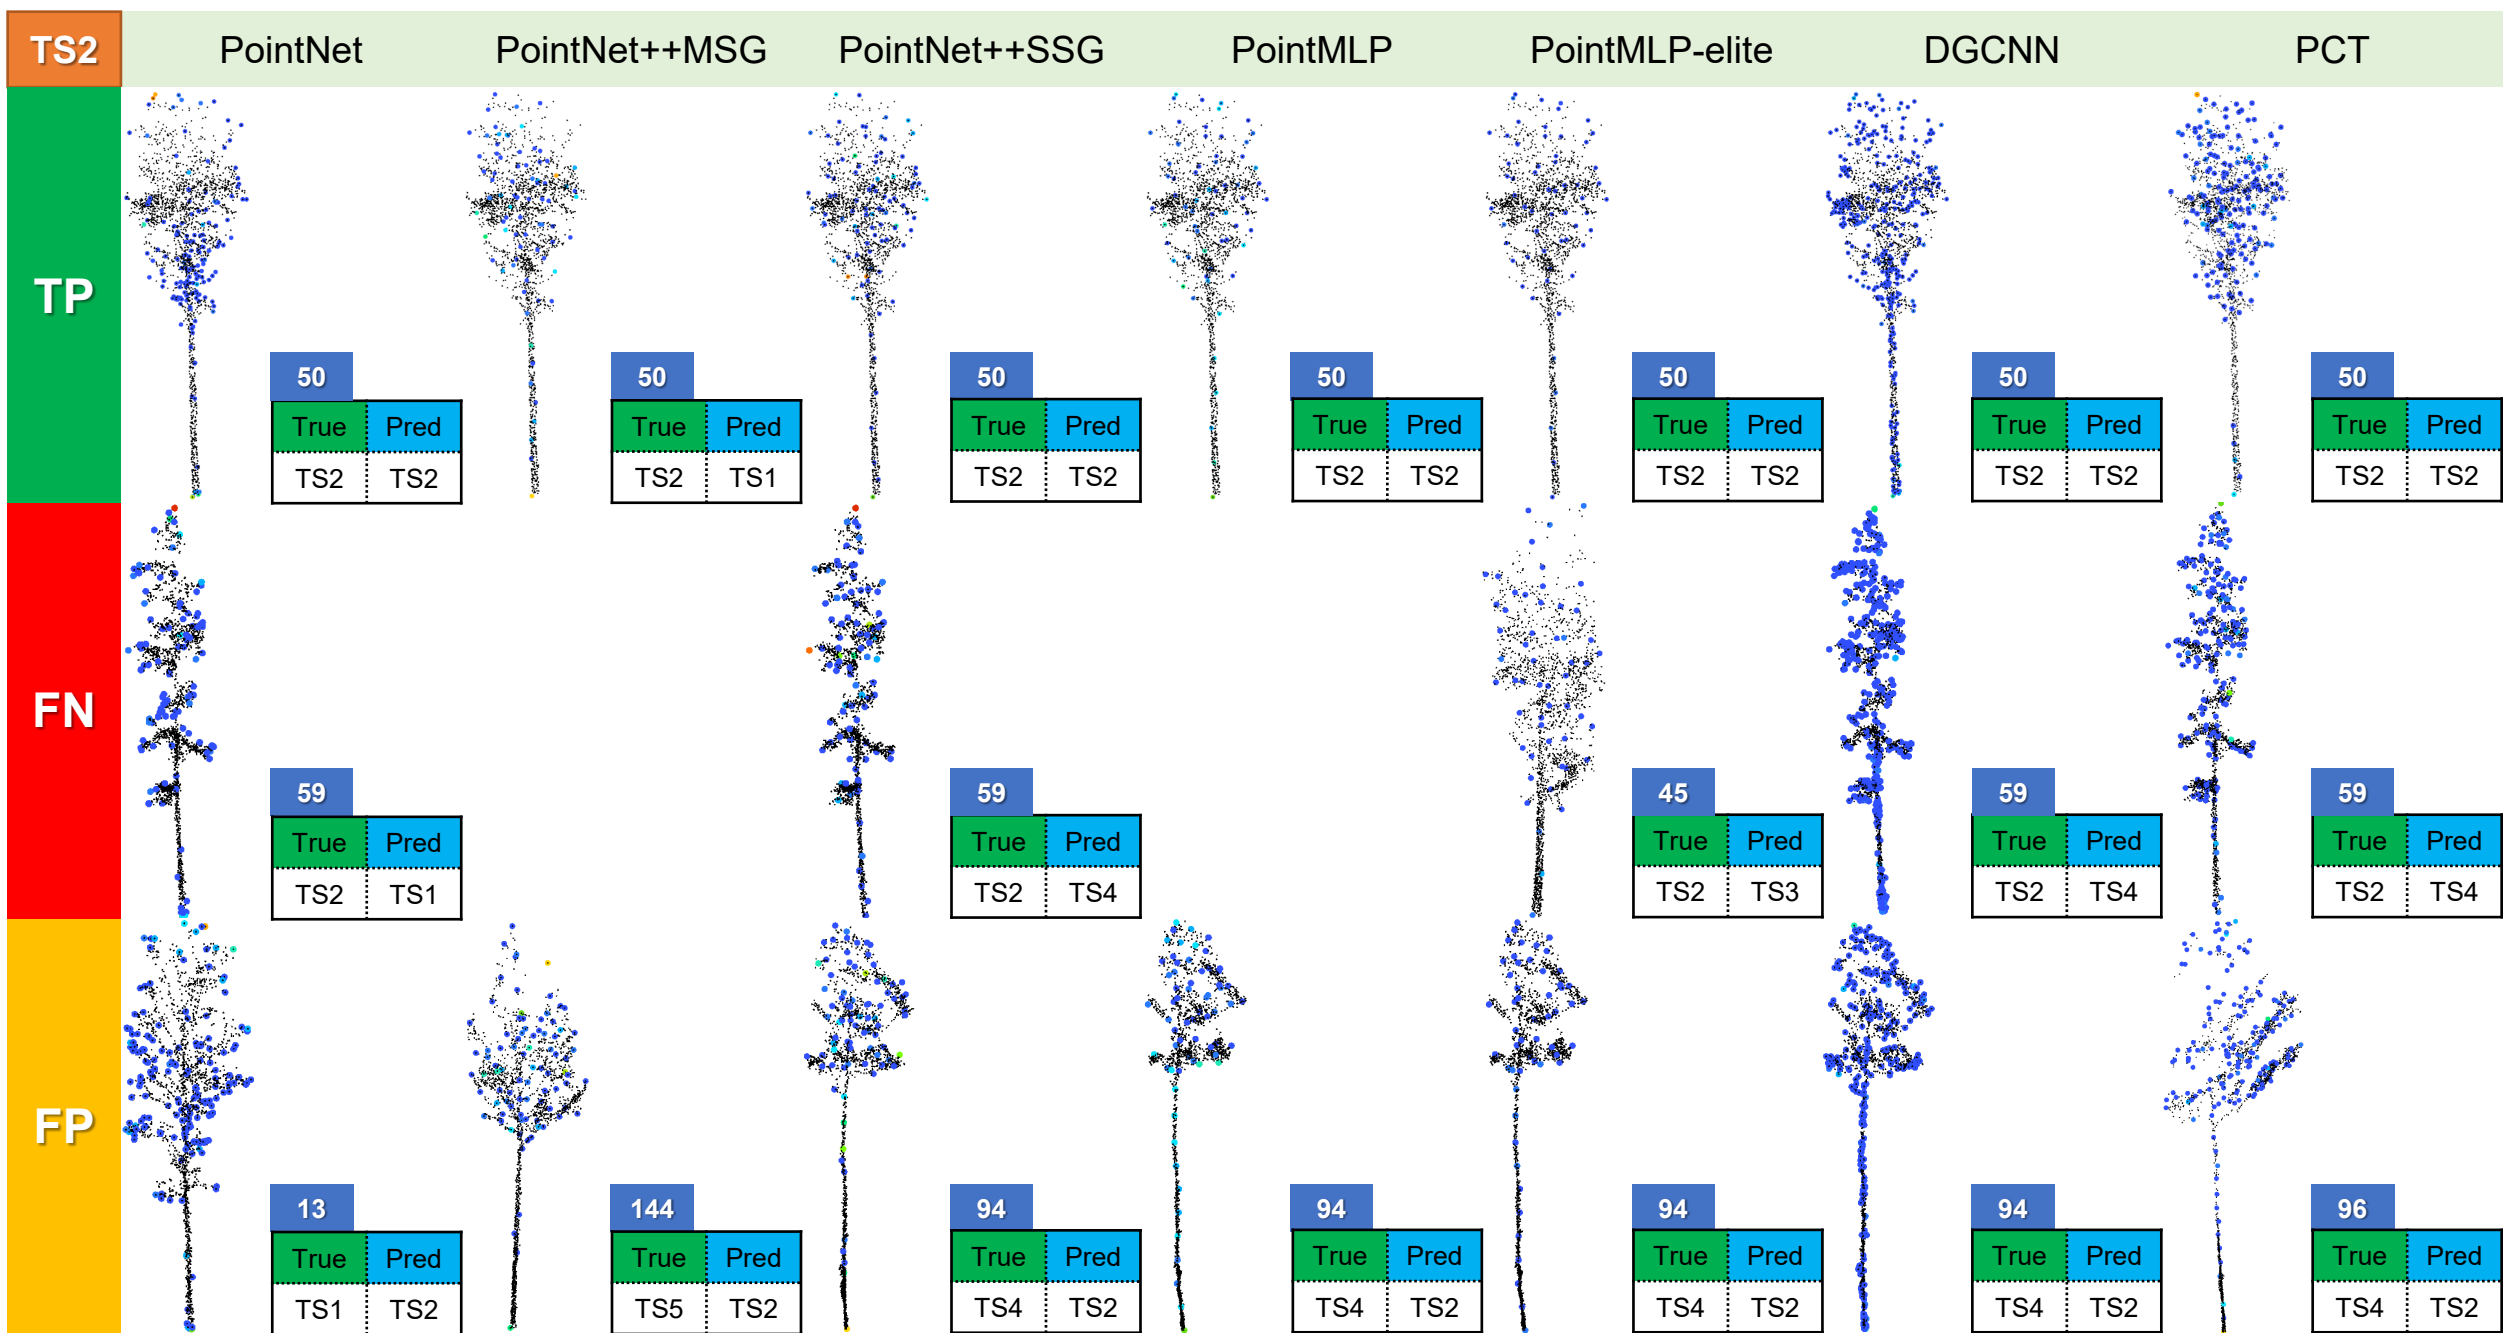

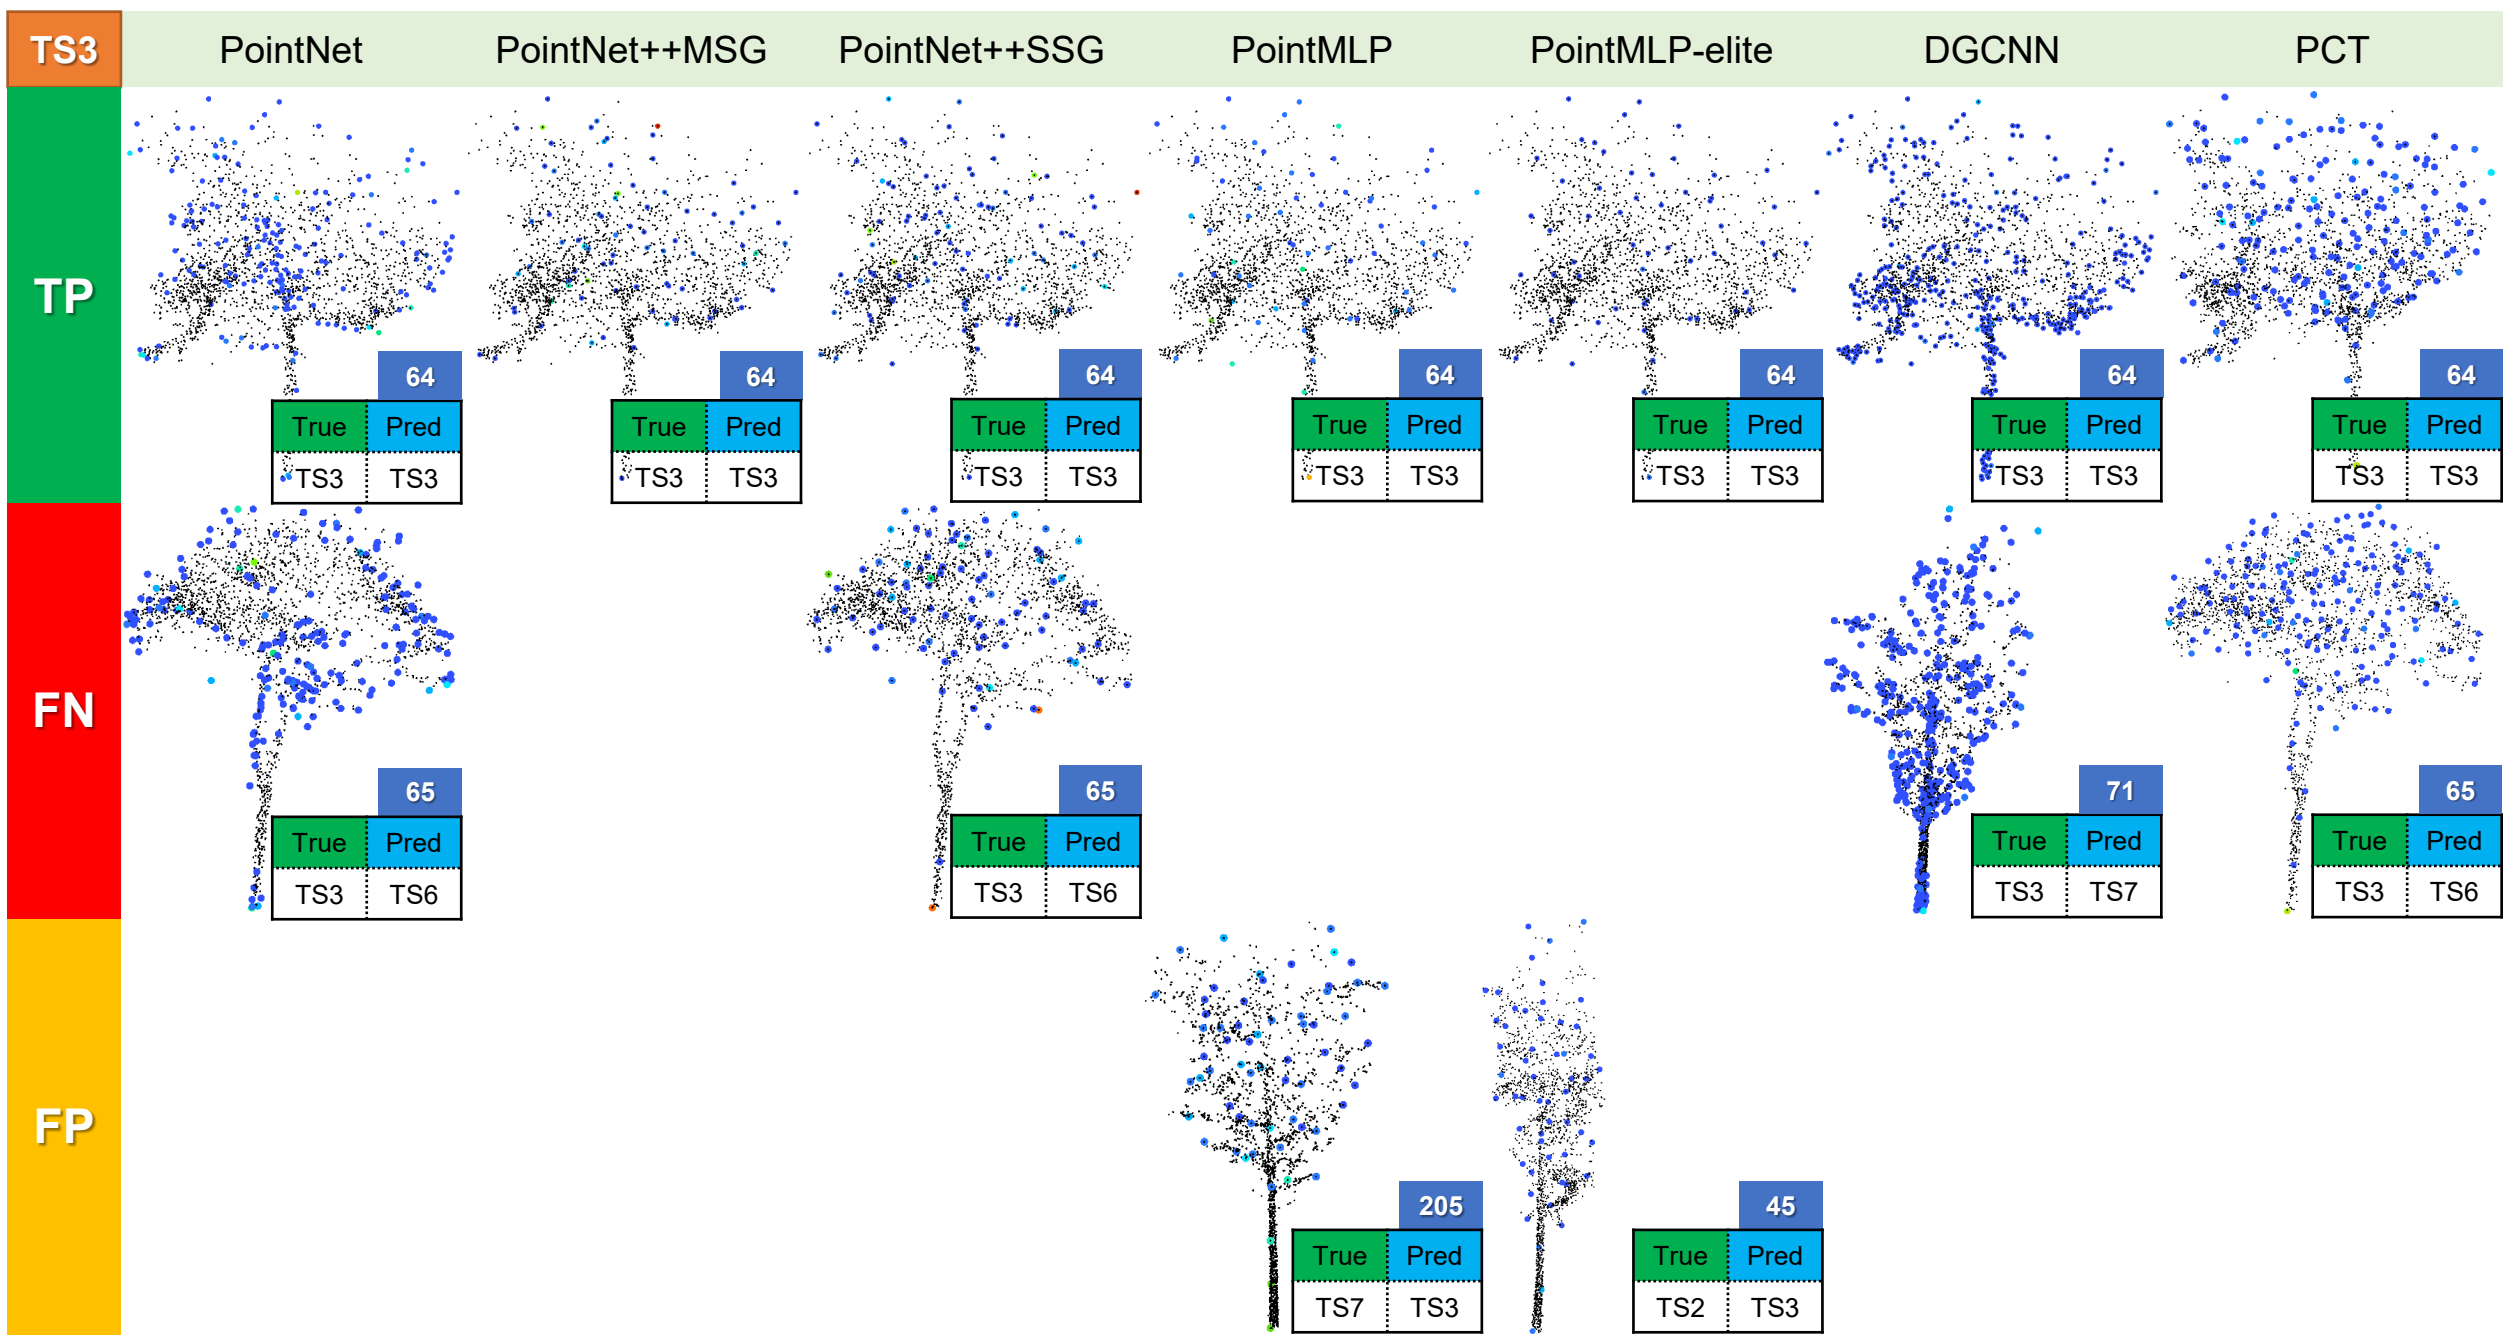

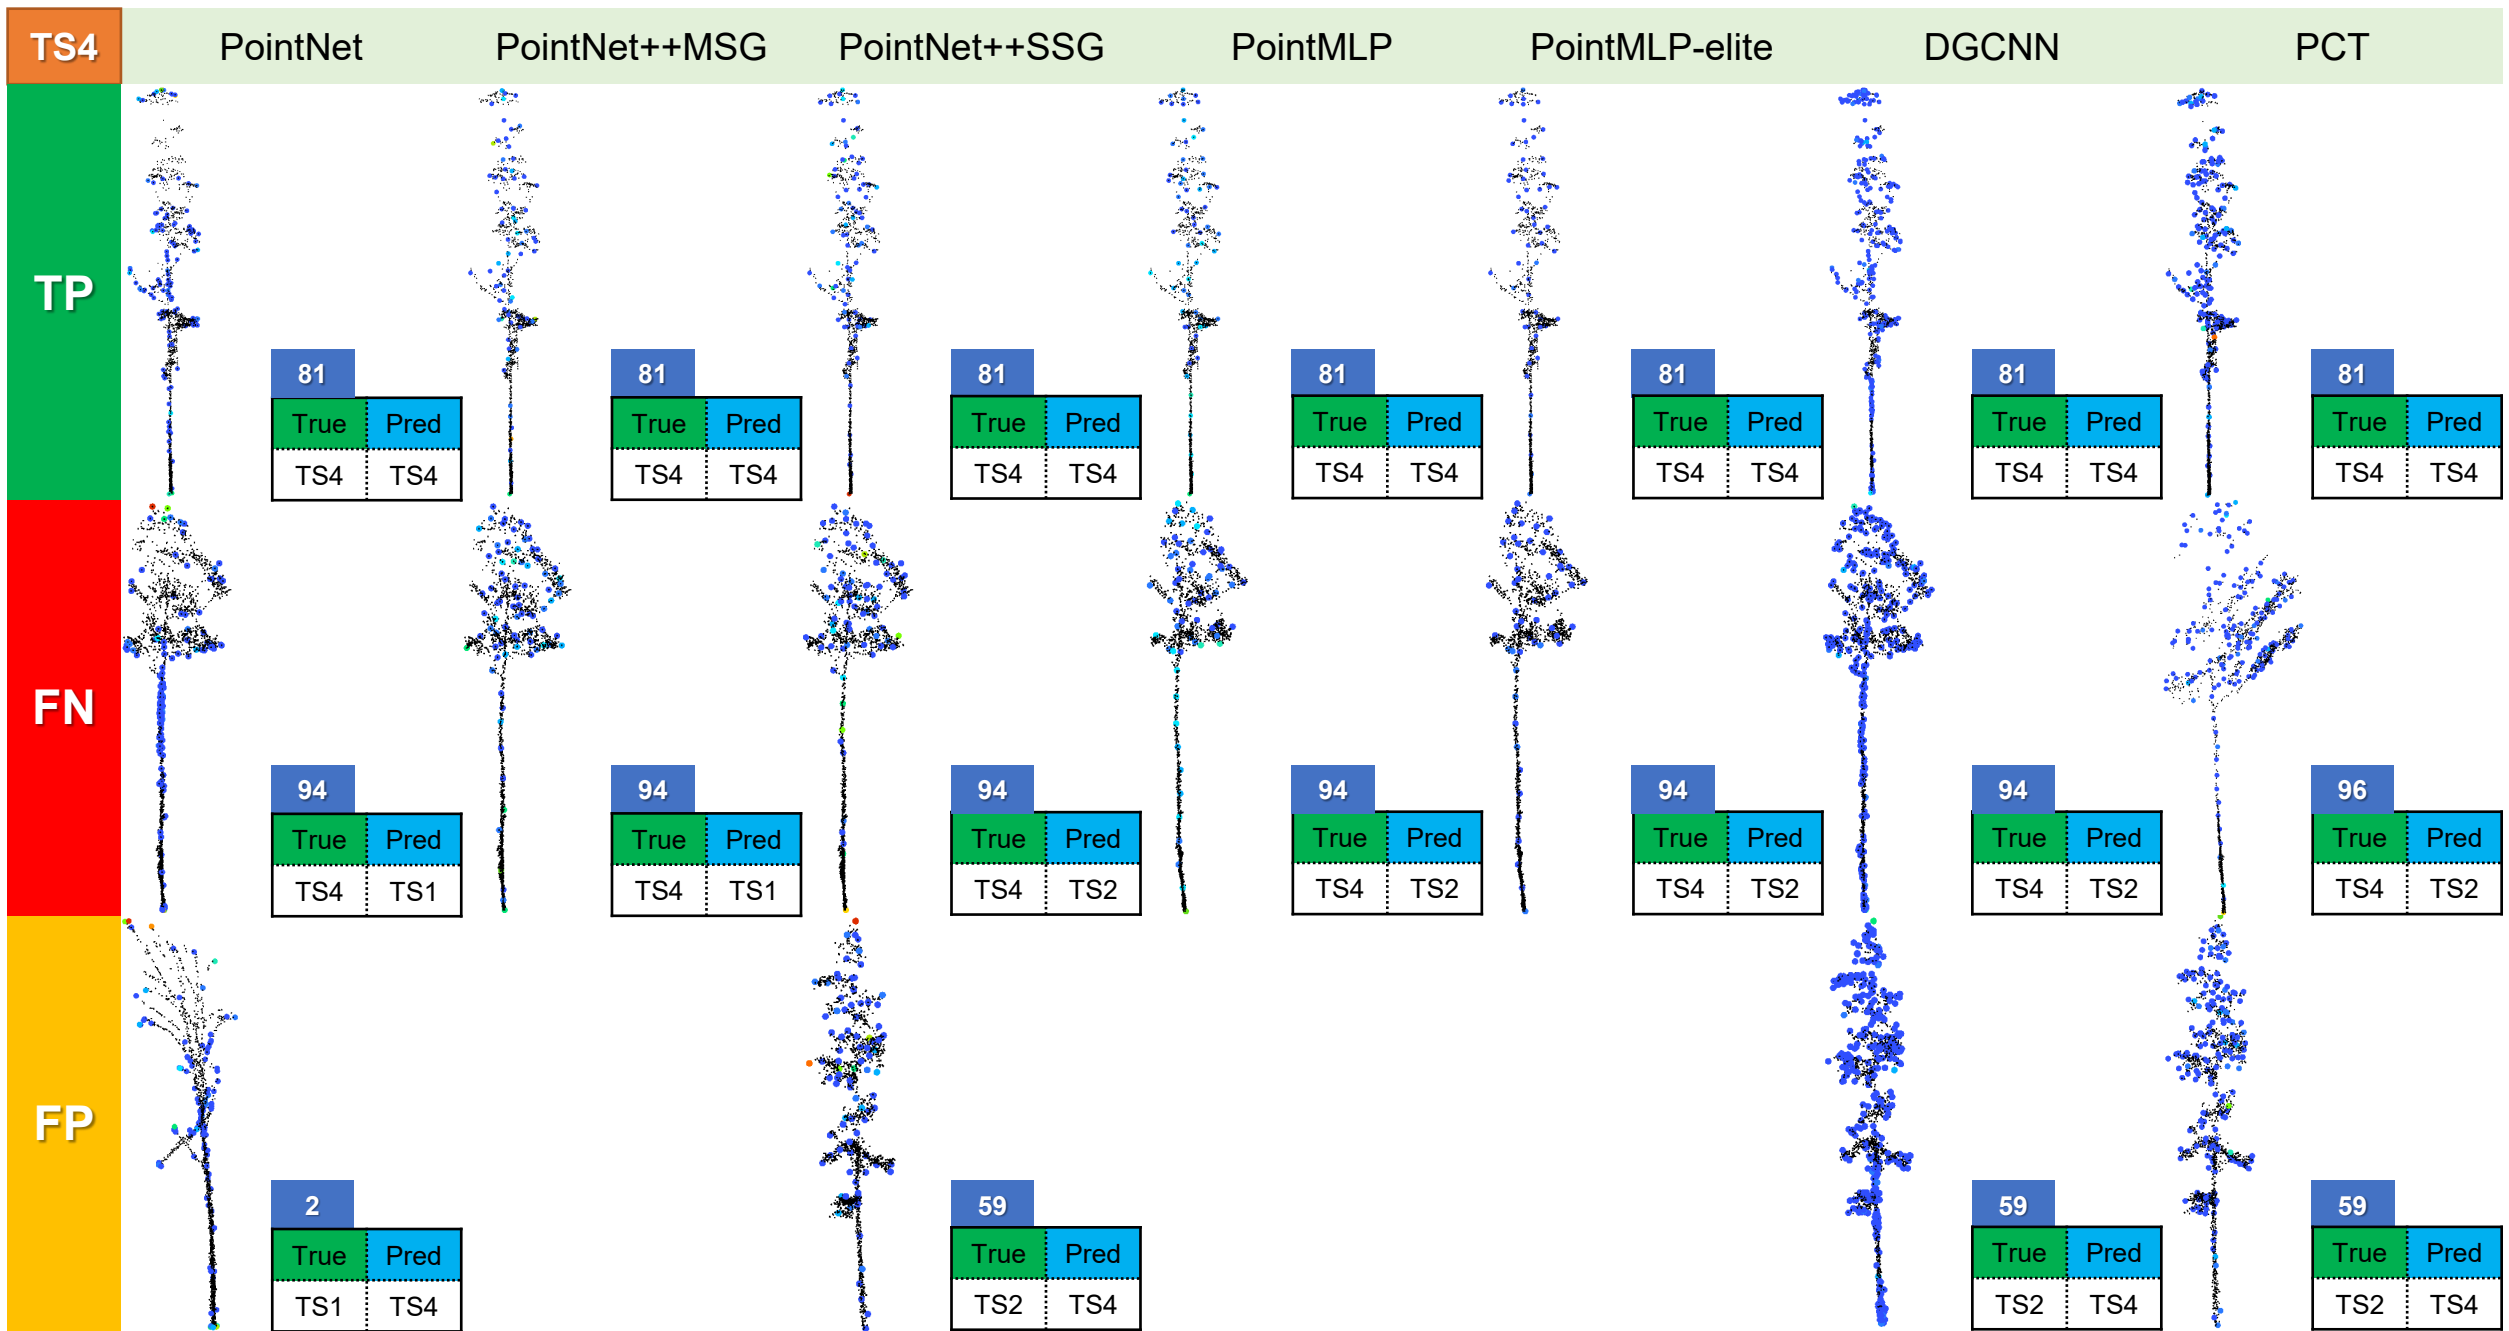

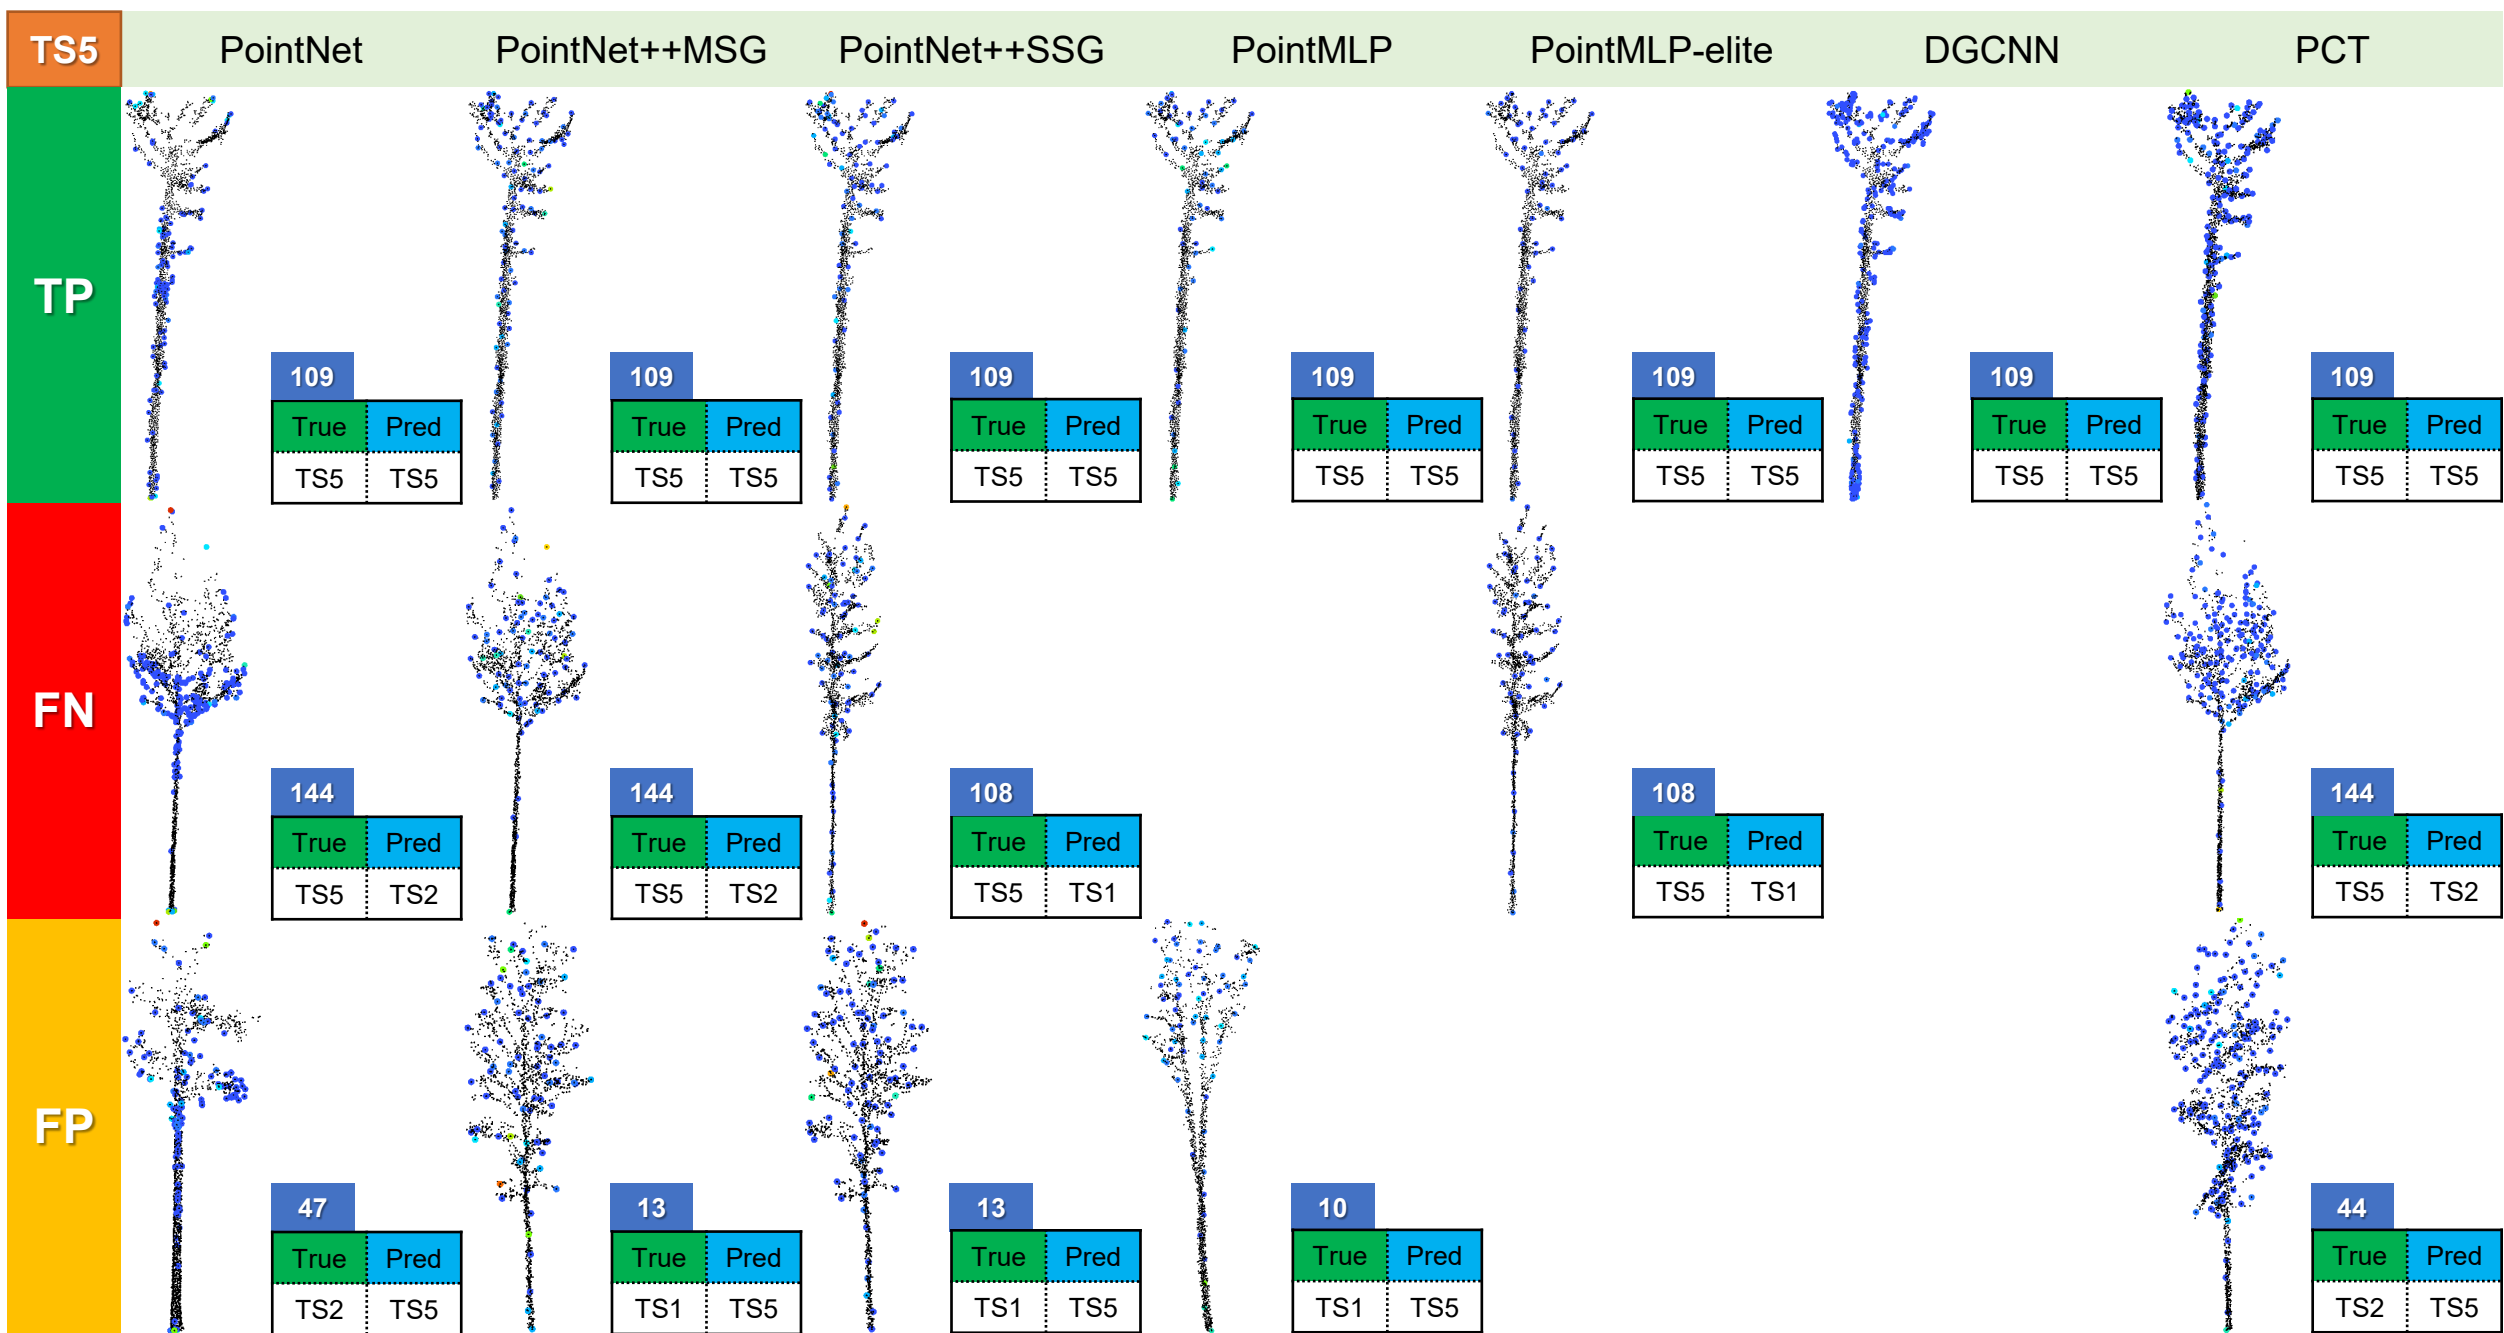

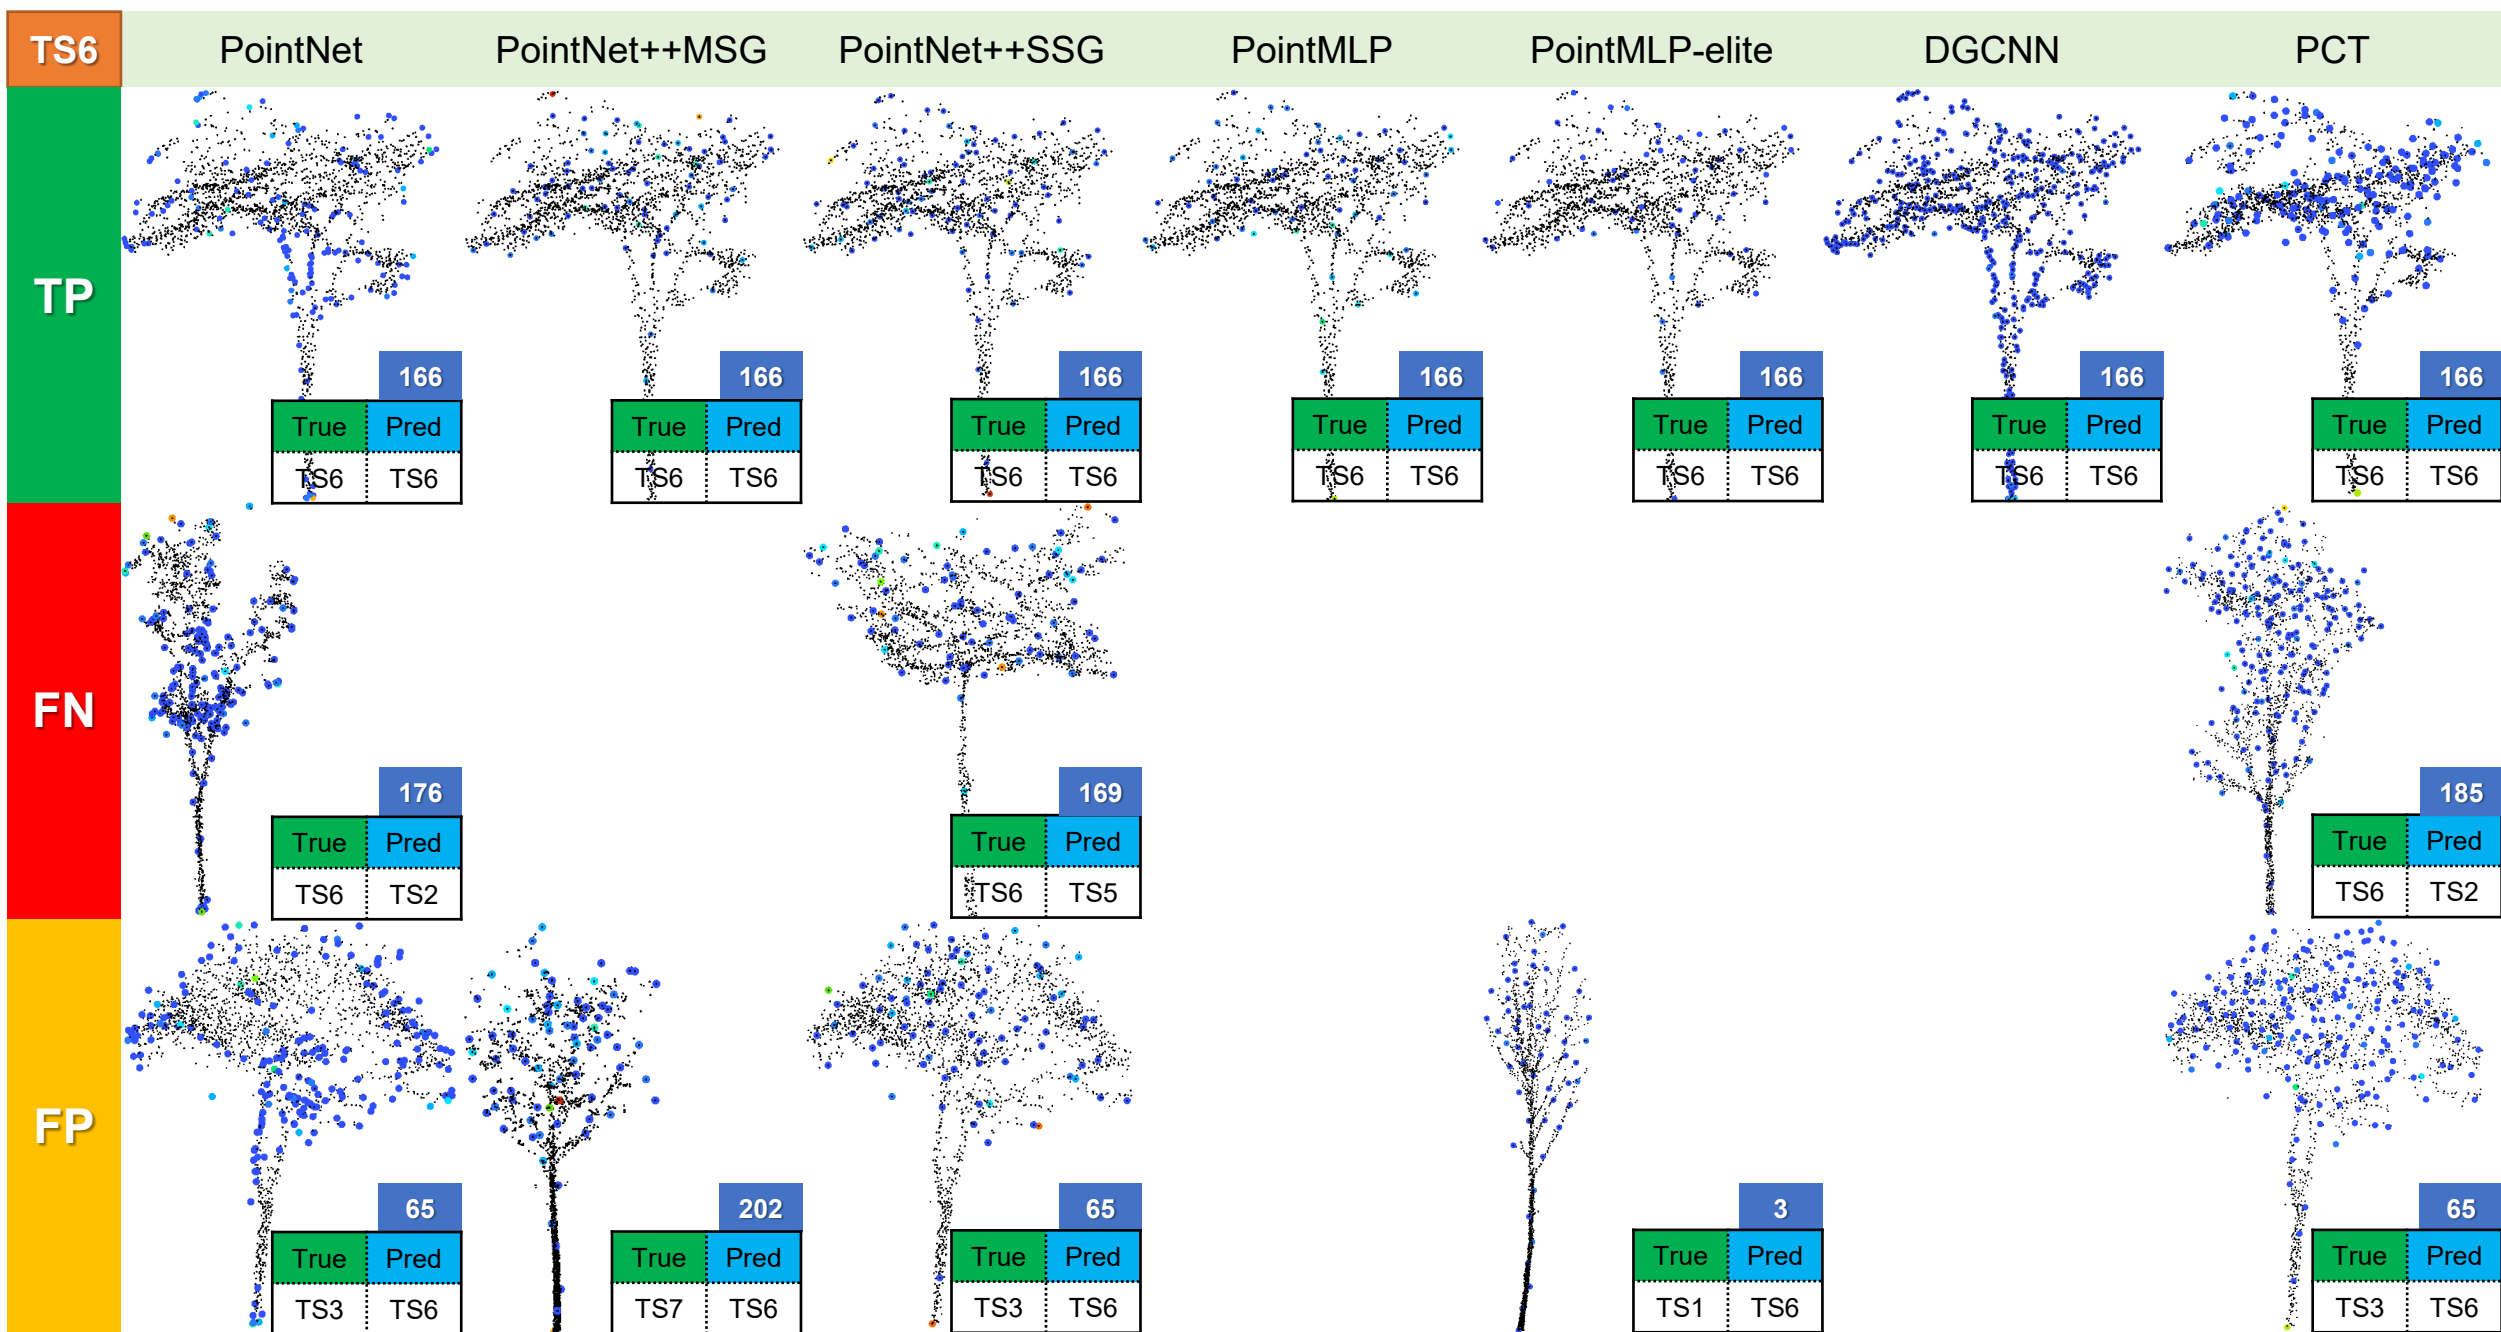



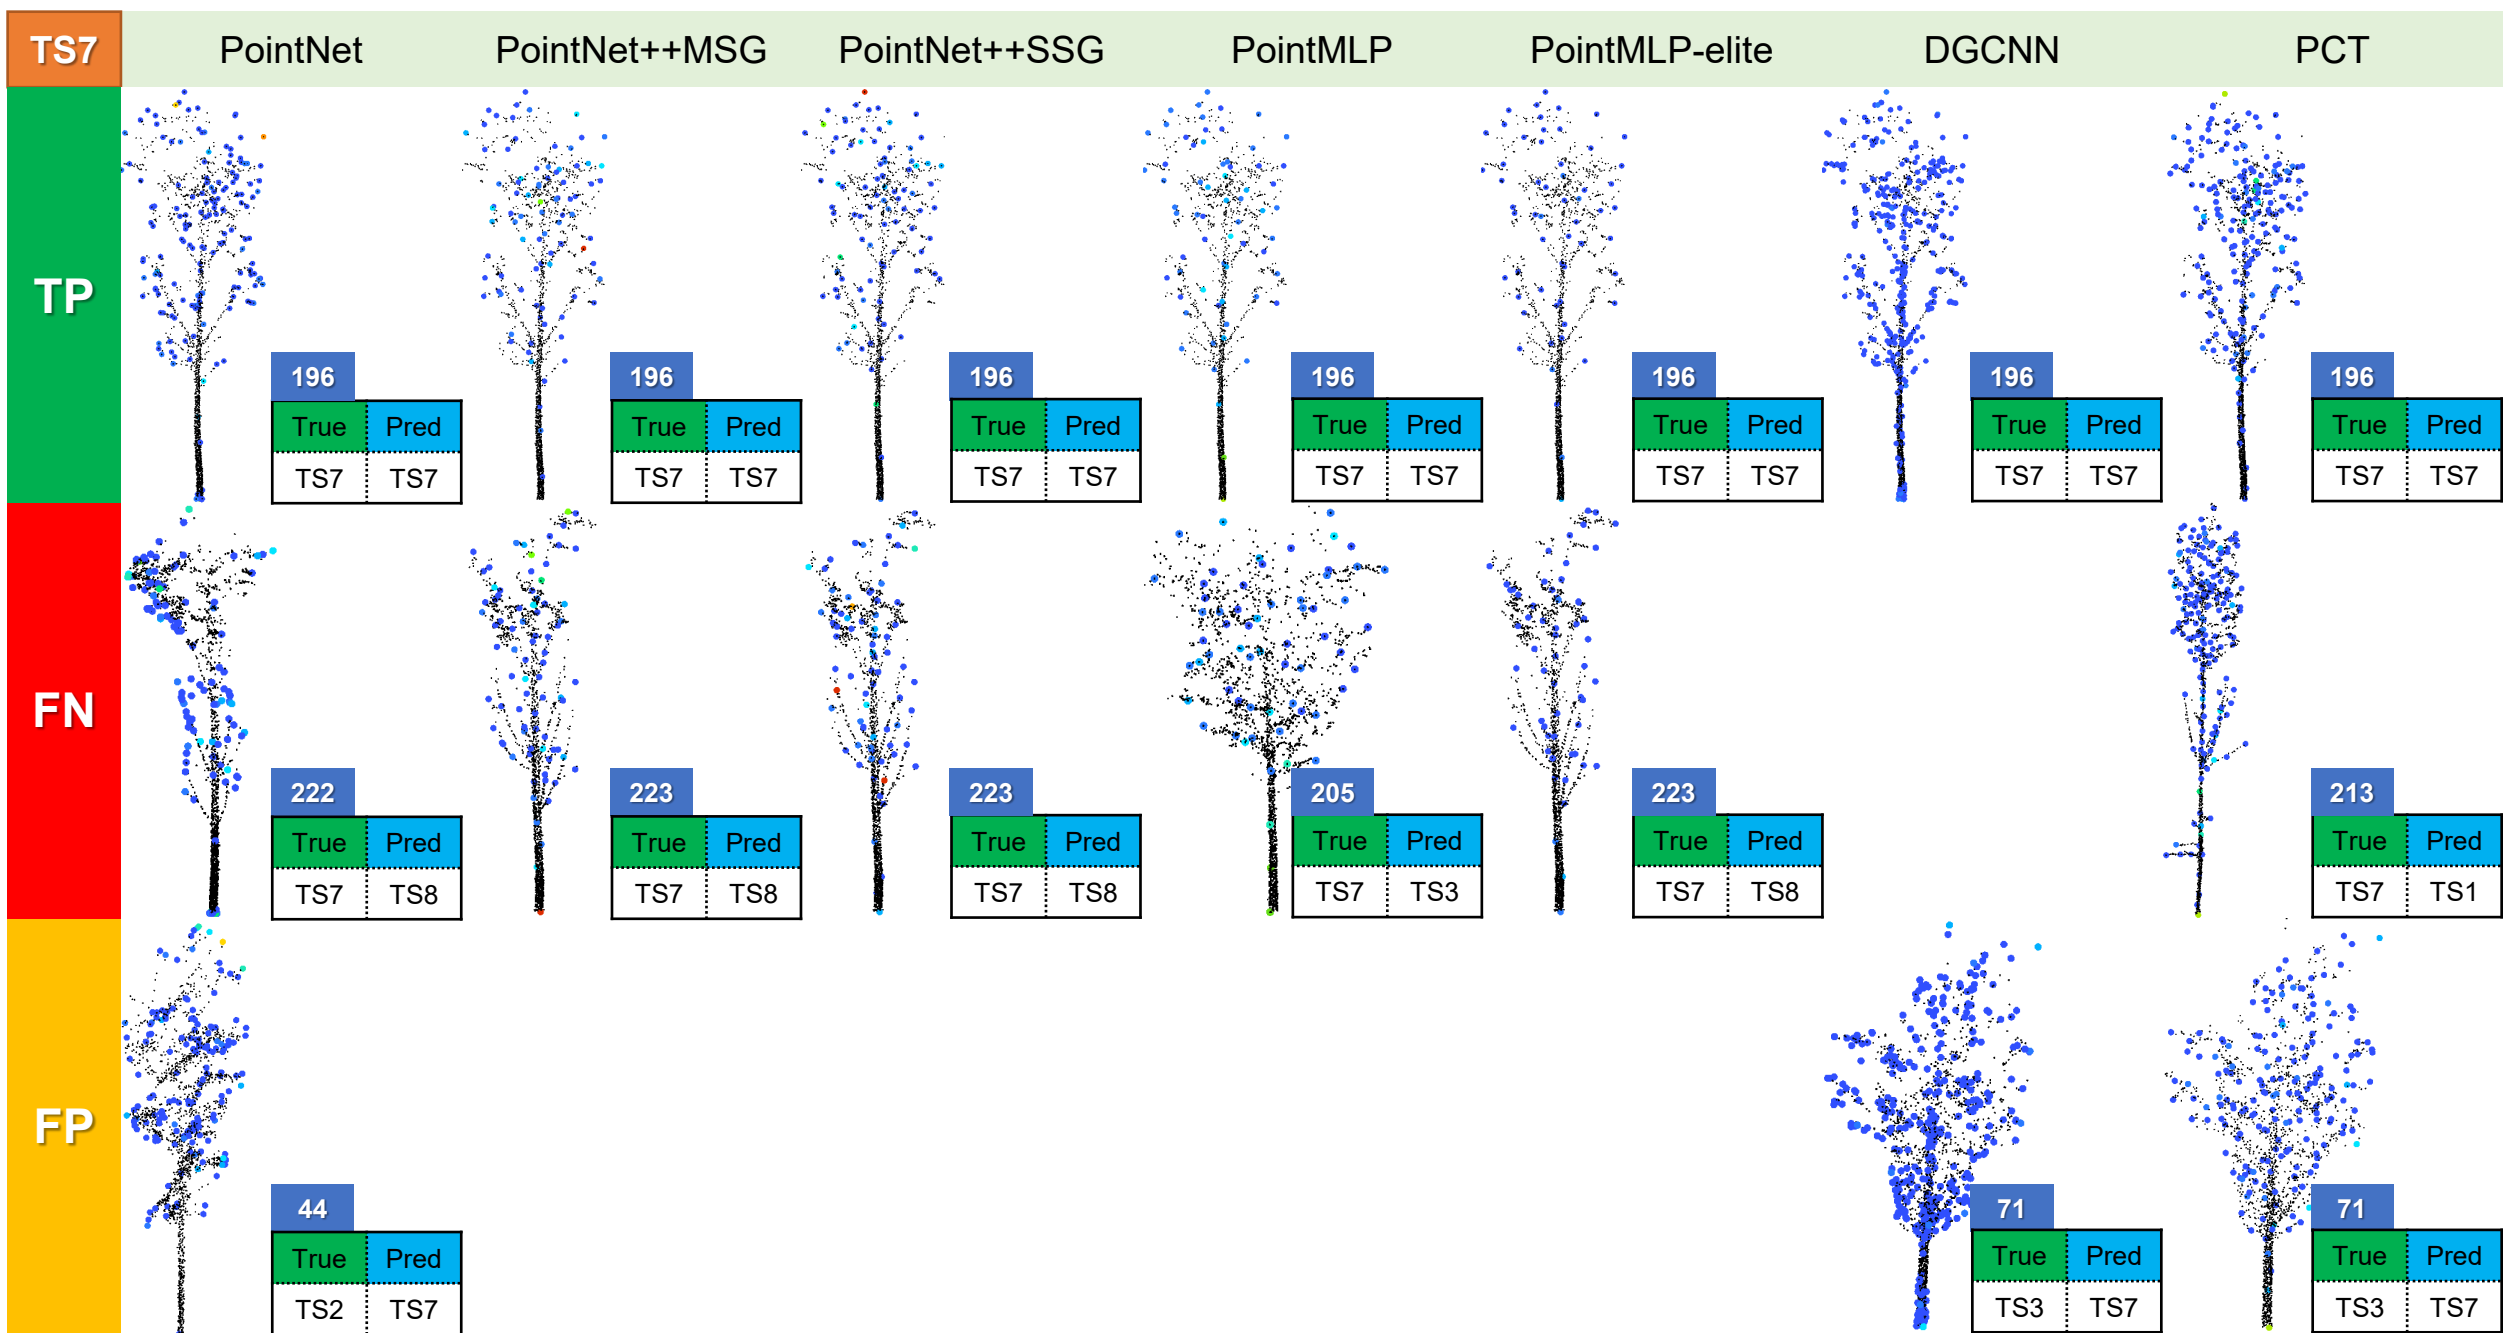



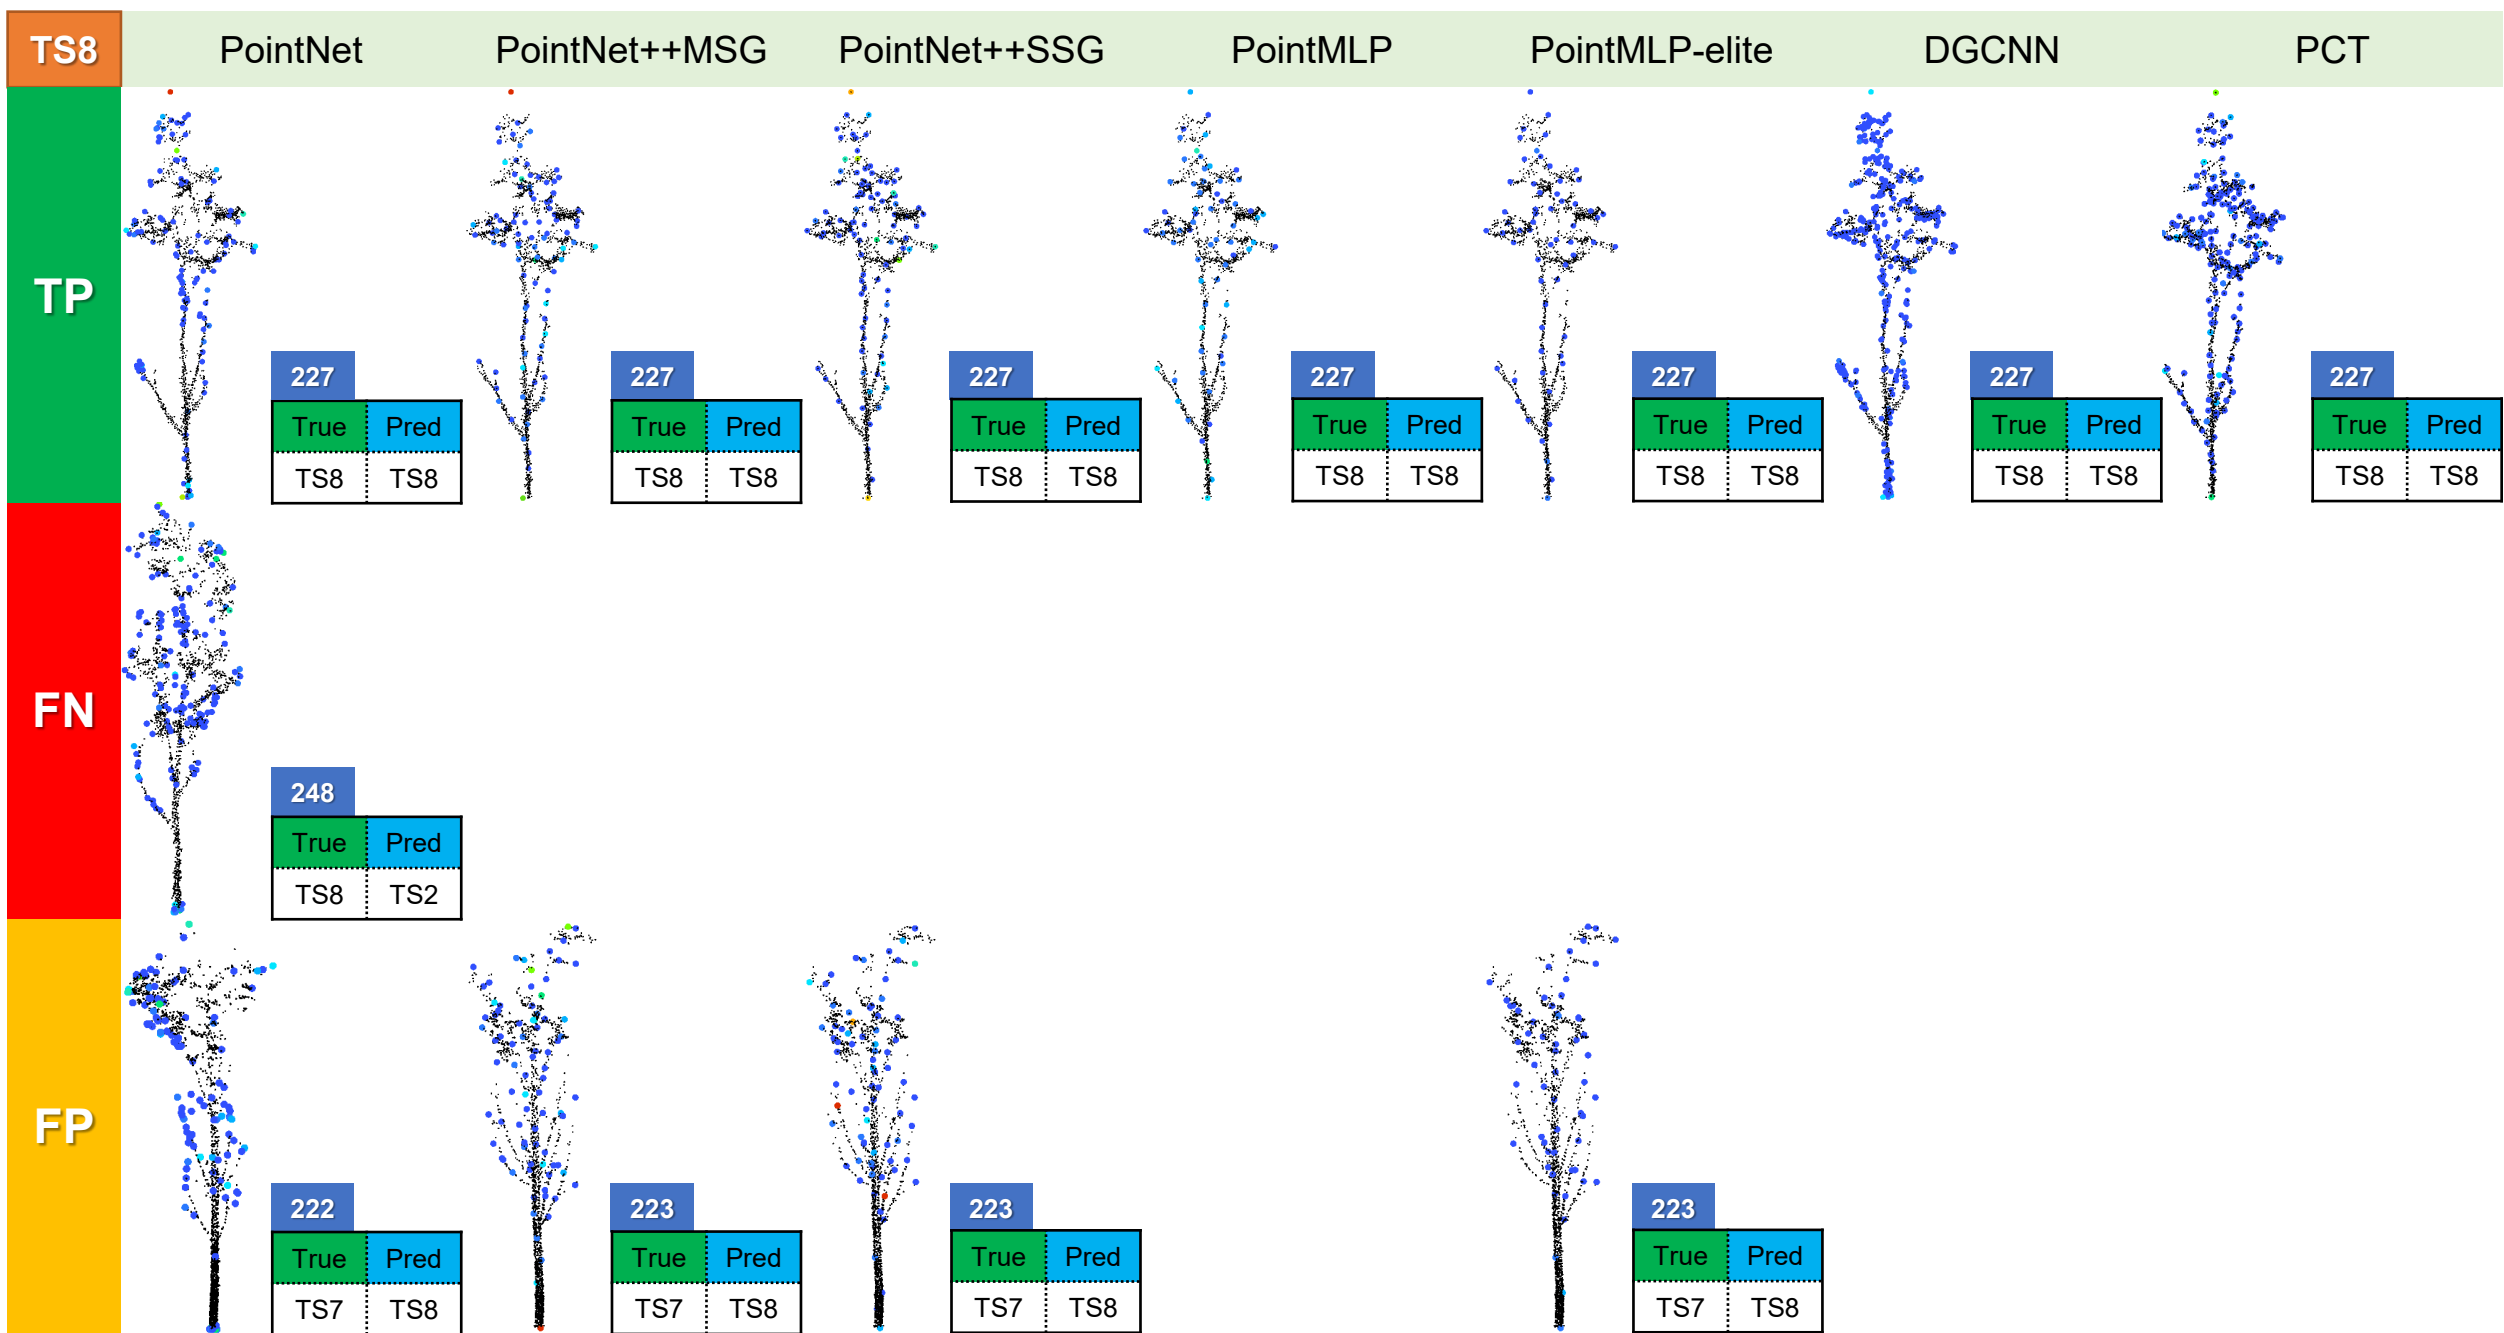

Supplement: s1 [file s1]
